# Supplementary material for: Metapangenomics reveals depth-dependent shifts in metabolic potential for the ubiquitous marine bacterial SAR324 lineage
Source: PubMed Central journal article supplement (PMC8364033; doi:10.1186/s40168-021-01119-5), 2021-08-13

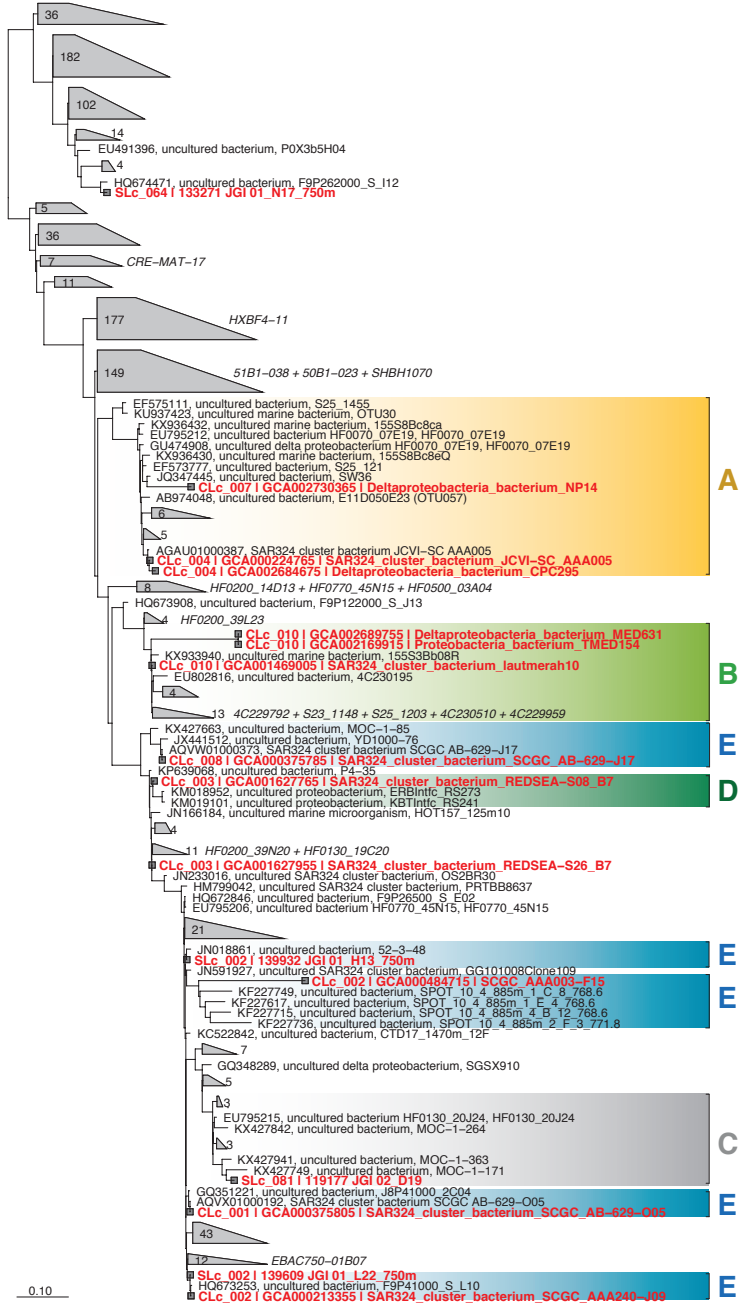

Supplement: 40168_2021_1119_MOESM8_ESM.pdf [file 40168_2021_1119_MOESM8_ESM.pdf]
