# Supplementary material for: Metapangenomics reveals depth-dependent shifts in metabolic potential for the ubiquitous marine bacterial SAR324 lineage
Source: Microbiome. 2021 Aug 13;9:172. doi: 10.1186/s40168-021-01119-5 (PMC8364033; doi:10.1186/s40168-021-01119-5)
Supplement: Supplementary file 11 — Additional file 10: Supplementary Figure 7. Protein alignment of rhodopsins identified in SAR324 population genomes and closest relatives retrieved from HOT time-series metagenomes. Amino acid residue motifs involved in ion pumping, opsin fixation and spectral tuning are highlighted by black rectangles. Proteorhodpsin-like sequences are displayed in blue and Xanthorhodopsin-like sequences in green. Amino acid residues are colored according to properties and conservation of residues (ClustalX). Consensus sequence and colored bars of sequence conservation have been created using SnapGene Viewer v.4.2.6. Predicted secondary and tertiary structures of rhodopsins have been predicted using RaptorX server. [file 40168_2021_1119_MOESM11_ESM.pdf]

|                 |     |                                                                                     |             |       |
|-----------------|-----|-------------------------------------------------------------------------------------|-------------|-------|
| Proteorhodopsin | 1.  | ALOHA_OTU110_otuREP_e12975c4f0b5301216b5e8fa350af1b_403 (HOT231_1_0075m_rep_c32553) |             |       |
|                 | 2.  | ALOHA_OTU114_otuREP_bffe06157d00c453c89cf8c5ee6c405_348 (HOT224_1_0075m_rep_c44630) |             |       |
|                 | 3.  | SAR324_SLC_189                                                                      | GC_00002086 | 18653 |
|                 | 4.  | SAR324_CLC_007                                                                      | GC_00002086 | 18651 |
|                 | 5.  | SAR324_SLC_201                                                                      | GC_00002086 | 18654 |
|                 | 6.  | SAR324_CLC_004                                                                      | GC_00002086 | 18650 |
|                 | 7.  | SAR324_SLC_081                                                                      | GC_00002086 | 18652 |
| XR-like         | 8.  | ALOHA_OTU34_otuREP_7ce6ae12d74bea4ff93f99717c94eb5b_606 (HOT226_1_0075m_c26173)     |             |       |
|                 | 9.  | SAR324_CLC_007                                                                      | GC_00002262 | 19531 |
|                 | 10. | SAR324_CLC_004                                                                      | GC_00002262 | 19530 |
|                 | 11. | SAR324_CLC_019                                                                      | GC_00002262 | 19533 |
|                 | 12. | SAR324_CLC_018                                                                      | GC_00002262 | 19532 |
|                 | 13. | SAR324_SLC_201                                                                      | GC_00002262 | 19534 |

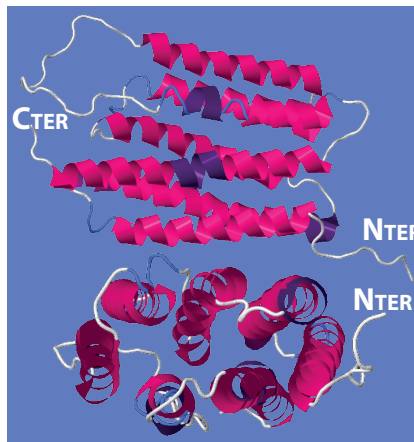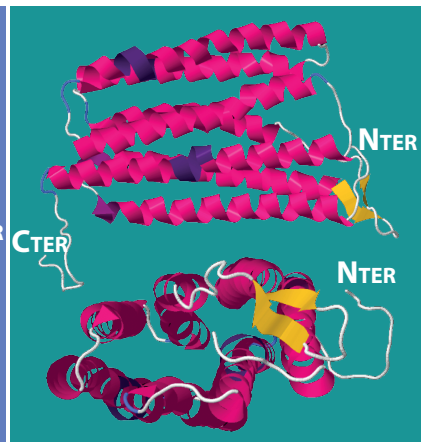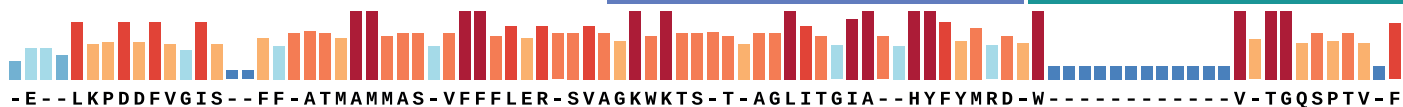

|                 |    |                                                      |                   |             |            |             |    |
|-----------------|----|------------------------------------------------------|-------------------|-------------|------------|-------------|----|
| Proteorhodopsin | 1  | MESVLKPPDDFVGIS--FFVATMAMMASAVFFFFERGSVKGKWKTSLTVA   | GLITGVA           | AIHYLYMRDMW | -----      | VETGQSPTV-F | 75 |
|                 | 2  | METLLKPPDDFVGIS--FFVATMAMMASAVFFFLERDSVAGKWKTSVTVA   | GLITGIA           | AVHYFYMRD   | VW-----    | VTTGQSPTV-F | 75 |
|                 | 3  | MESVLKPPDDFVGIS--FFVATMAMMASAVFFFFERGSVKGKWKTSLTVA   | GLITGVA           | AIHYLYMRDMW | -----      | VETGQSPTV-F | 75 |
|                 | 4  | METLLKPPDDFVGIS--FFVATMAMMASAVFFFLERDSVAGKWKTSVTVA   | GLITGIA           | AVHYFYMRD   | VW-----    | VTTGQSPTV-F | 75 |
|                 | 5  | METLLKPPDDFVGIS--FFVATMAMMASAVFFFLERDSVAGKWKTSVTVA   | GLITGIA           | AVHYFYMRD   | VW-----    | VTTGQSPTV-F | 75 |
|                 | 6  | METLLKPPDDFVGIS--FFVATMAMMASAVFFFLERDSVAGKWKTSVTVA   | GLITGIA           | AVHYFYMRD   | VW-----    | VTTGQSPTV-F | 75 |
|                 | 7  | MENILKPPDDFVGIS--FFIATMAMMASVFFFFERDSVLGKWKTSVTLA    | GLITGIA           | TVHYFYMRD   | VW-----    | VTTGQSPTV-F | 75 |
| XR-like         | 8  | -MPELSADQFSLIYNMLSLTIAAMFGTFAFFVLAKENIAVKYKPAIVCSSLV | LVIAGYHYFRIFQSWDD | AYAISES     | GMVATGVPFN | DAY         | 89 |
|                 | 9  | -MPELSADQFSLIYNMLSLTIAAMFGTFAFFVLAKENIAVKYKPAIVCSSLV | LVIAGYHYFRIFQSWDD | AYAISES     | GMVATGVPFN | DAY         | 89 |
|                 | 10 | -MPELSADQFSLIYNMLSLTIAAMFGTFAFFVLAKENIAVKYKPAIVCSSLV | LVIAGYHYFRIFQSWDD | AYAISES     | GMVATGVPFN | DAY         | 89 |
|                 | 11 | -MPELSADQFSLIYNMLSLTIAAMFGTFAFFVLAKENIAVKYKPAIVCSSLV | LVIAGYHYFRIFQSWDD | AYAISES     | GMVATGVPFN | DAY         | 89 |
|                 | 12 | -MPELSADQFSLIYNMLSLTIAAMFGTFAFFVLAKENIAVKYKPAIVCSSLV | LVIAGYHYFRIFQSWDD | AYAISES     | GMVATGVPFN | DAY         | 89 |
|                 | 13 | -----LTIAAMFGTFAFFVLAKENIAVKYKPAIVCSSLV              | LVIAGYHYFRIFQSWDD | AYAISES     | GMVATGVPFN | DAY         | 72 |

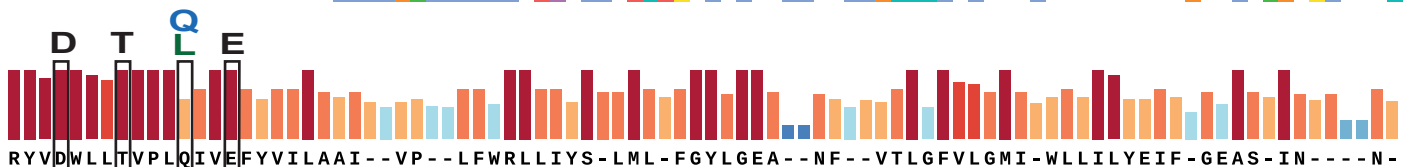

|                 |    |                                         |                              |                        |                          |      |      |     |
|-----------------|----|-----------------------------------------|------------------------------|------------------------|--------------------------|------|------|-----|
| Proteorhodopsin | 1  | RYIDWLLTVPLQIVEFYILILAAITIVPAALFWRLLIYS | SLVMLVFGYLGEA--              | GFMNVTLG               | FVIGMAGWLLILYEIFAGEASKIN | NAD  | SANA | 163 |
|                 | 2  | RYVDWLLTVPLQIVEFYILILAAIAAVPIILFWRLLVYS | SLIMLIFGYLGEA--              | GFVDVTLG               | FILGMVGWLLILYEIFFGEASQIN | NANS | ANT  | 163 |
|                 | 3  | RYIDWLLTVPLQIVEFYILILAAITIVPAALFWRLLIYS | SLVMLVFGYLGEA--              | GFMNVTLG               | FVIGMAGWLLILYEIFAGEASKIN | NAD  | SANA | 163 |
|                 | 4  | RYVDWLLTVPLQIVEFYILILAAIAAVPIILFWRLLVYS | SLIMLIFGYLGEA--              | GFVDVTLG               | FILGMVGWLLILYEIFFGEASQIN | NANS | ANT  | 163 |
|                 | 5  | RYVDWLLTVPLQIVEFYILILAAIAAVPIILFWRLLVYS | SLIMLIFGYLGEA--              | GFVDVTLG               | FILGMVGWLLILYEIFFGEASQIN | NANS | ANT  | 163 |
|                 | 6  | RYVDWLLTVPLQIVEFYILILAAIAAVPIILFWRLLVYS | SLIMLIFGYLGEA--              | GFVDVTLG               | FILGMVGWLLILYEIFFGEASQIN | NANS | ANT  | 163 |
|                 | 7  | RYVDWLLTVPLQIVEFYVILAIIASVPIALFWRLLSYS  | SLIMLIFGYLGEA--              | NFINVTLG               | FVIGMIFWLLIYEIFFGEASRINS | NS   | ANE  | 163 |
| XR-like         | 8  | RYVDWLLTVPLLLVELIVLLSLTRERMQDVLTRLVIAS  | VLMIALGYPGEVSDNTGTQALFFVLAMI | PFVYILRVLWKELAAEIAEE-- | DG                       |      |      | 177 |
|                 | 9  | RYVDWLLTVPLLLVELIVLLSLTRERMQDVLTRLVIAS  | VLMIALGYPGEVSDNTGTQALFFVLAMI | PFVYILRVLWKELAAEIAEE-- | DG                       |      |      | 177 |
|                 | 10 | RYVDWLLTVPLLLVELIVLLSLTRERMQDVLTRLVIAS  | VLMIALGYPGEVSDNTGTQALFFVLAMI | PFVYILRVLWKELAAEIAEE-- | DG                       |      |      | 177 |
|                 | 11 | RYVDWLLTVPLLLVELIVLLSLTRERMQDVLTRLVIAS  | VLMIALGYPGEVSDNTGTQALFFVLAMI | PFVYILRVLWKELAAEIAEE-- | DG                       |      |      | 177 |
|                 | 12 | RYVDWLLTVPLLLVELIVLLSLTRERMQDVLTRLVIAS  | VLMIALGYPGEVSDNTGTQALFFVLAMI | PFVYILRVLWKELAAEIAEE-- | DG                       |      |      | 177 |
|                 | 13 | RYVDWLLTVPLLLVELIVLLSLTRERMQDVLTRLVIAS  | VLMIALGYPGEVSDNTGTQALFFVLAMI | PFVYILRVLWKELAAEIAEE-- | DG                       |      |      | 160 |

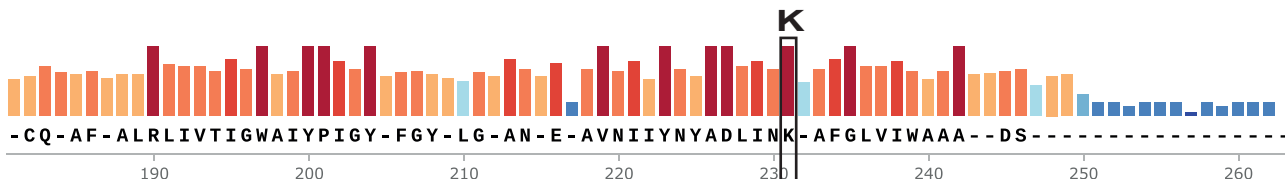

|                 |    |                                       |                                 |                   |       |  |     |
|-----------------|----|---------------------------------------|---------------------------------|-------------------|-------|--|-----|
| Proteorhodopsin | 1  | SCQKAFNALRLIVTIGWAIYPIGYVFGYLLSSNIN   | -AVNIIYNYADLINKTAFGLVIWAAA      | IKDSEASA*         | ----- |  | 233 |
|                 | 2  | SCQKAFHALRLIVTVGWAIYPIGYFWGYMLD       | GANVE-AVNIIYNYADLINKMAFGLVIWAAA | KQDSKVE*          | ----- |  | 232 |
|                 | 3  | SCQKAFNALRLIVTIGWAIYPIGYVFGYLLSSNIN   | -AVNIIYNYADLINKTAFGLVIWAAA      | IKDSEASA          | ----- |  | 232 |
|                 | 4  | SCQKAFHALRLIVTVGWAIYPIGYFWGYMLD       | GANVE-AVNIIYNYADLINKMAFGLVIWAAA | KQDSKVE           | ----- |  | 231 |
|                 | 5  | SCQKAFHALRLIVTVGWAIYPIGYFWGYMLD       | GANVE-AVNIIYNYADLINKMAFGLVIWAAA | KQDSKVE           | ----- |  | 231 |
|                 | 6  | SCQKAFHALRLIVTVGWAIYPIGYFWGYMLD       | GANVE-AVNIIYNYADLINKMAFGLVIWAAA | KQDSKVE           | ----- |  | 231 |
|                 | 7  | ACQNAFKALRLIVTIGWAIYPIGYFWGYMLGSANMN  | -AVNIIYNYADLINKTAFGLVIWAAAK     | DSNISV            | ----- |  | 232 |
| XR-like         | 8  | KVKELIEQTRMLLMISWLFYPVAYIFNLAGGTAEAEI | GVQVGYTIADIVSKCVYGVMVYFIAREKT   | MLDSAPASAKAAAAKA* |       |  | 260 |
|                 | 9  | KVKELIEQTRMLLMISWLFYPVAYIFNLAGGTAEAEI | GVQVGYTIADIVSKCVYGVMVYFIAREKT   | MLDSAPASAKAAAAKA  |       |  | 259 |
|                 | 10 | KVKELIEQTRMLLMISWLFYPVAYIFNLAGGTAEAEI | GVQVGYTIADIVSKCVYGVMVYFIAREKT   | MLDSAPASAKAAAAKA  |       |  | 259 |
|                 | 11 | KVKELIEQTRMLLMISWLFYPVAYIFNLAGGTAEAEI | GVQVGYTIADIVSKCVYGVMVYFIAREKT   | MLDSAPVSAK-ATAKA  |       |  | 258 |
|                 | 12 | RVKELIEQTRMLLMISWLFYPVAYIFNLAGGTAEAEI | GVQVGYTIADIVSKCVYGVMVYFIAREKT   | MLDSAPASAKVATAKA  |       |  | 259 |
|                 | 13 | KVKELIEQTRMLLMISWLFYPVAYIFNLAGGTAEAEI | GVQVGYTIADIVSKCVYGVMVYFIAREKT   | MLDSAPVSAK-AAKA   |       |  | 241 |
